# Supplementary material for: Measurement of Bowel Wall Thickness by Transabdominal Ultrasonography Is Useful to Detect the Inflammation of Colon in Ulcerative Colitis Patients : A Retrospective Study
Source: Research Square preprint supplement (doi:10.21203/rs.3.rs-122414/v1), 2020-12-11
Supplement: Supplementary file 3 [file 6b7877ffd165cfaaac5475be.docx]

**Table 1. Demographics and clinical characteristics of the study patients**

**Table 2. Sensitivity, specificity, and predictive values of TUS for mucosal inflammation (BWT>2 mm, MES >0)**

**Table 3. Sensitivity, specificity, and predictive values of TUS for mucosal inflammation (BWT >3 mm, MES >0)**

**Table 4. Sensitivity, specificity, and predictive values of TUS for mucosal inflammation (BWT >2 mm, MES >1)**
