# Supplementary material for: Measurement of Bowel Wall Thickness by Transabdominal Ultrasonography Is Useful to Detect the Inflammation of Colon in Ulcerative Colitis Patients : A Retrospective Study
Source: Research Square preprint supplement (doi:10.21203/rs.3.rs-122414/v1), 2020-12-11
Supplement: Supplementary file 4 [file 770ae206c1222ee8ea9b2460.docx]

**Supplemental Table 1. Optimal cutoff value of AUC of each segment using the Youden Index**

**Supplementary Table 2. Sensitivity, specificity, and predictive values of TUS for mucosal inflammation per patients under each condition**
